# Supplementary material
Source: publisher figshare collection journal article supplement (https://acs.figshare.com/ndownloader/files/4776721)
Supplement: Supplementary file 1 [file 4776721]

## Supporting Information Available:

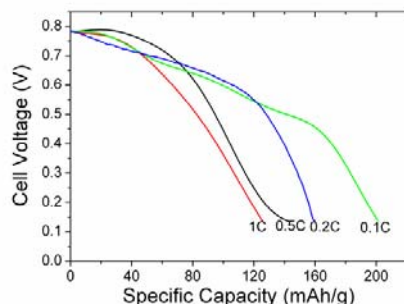

Figure S1 Discharge behavior of Al/I<sub>2</sub>-C cell at different discharge rates.

The TiO<sub>2</sub> (P25, Degussa, average particle size 21nm) porous film was deposited on F-doped tin oxide (FTO) conducting glass by a screen-printing technique. The thickness of the TiO<sub>2</sub> film was about 10  $\mu$ m. Dye (RuL<sub>2</sub>(NCS)<sub>2</sub>·2H<sub>2</sub>O, L=2,2'-bipyridyl-4,4'-dicarboxylic acid, Solaronix) adsorption was performed by soaking the TiO<sub>2</sub> films in the dye ethanol solution ( $3 \times 10^{-4}$  mol/L). Electrolytes were dropped on the dye-anchored TiO<sub>2</sub> films and then a sputtered platinum-coated counter-electrode was clipped firmly with the TiO<sub>2</sub>/dye/electrolyte glass plate. A mask with a window of 0.15 cm<sup>2</sup> was also clipped on the TiO<sub>2</sub> side to define the active area of the cells.

The cells were illuminated by an Oriel solar simulator (91192) under AM 1.5 (100 mWcm<sup>-2</sup>) irradiation. The incident light intensity was measured by a radiant power/energy meter (Oriel 70260). The current density-voltage (*I*-*V*) characteristics of the cells were recorded by a potentiostat/galvanostat (PAR, Model 263A).

The influence of iodine concentration on the performance of aluminum iodide base electrolytes in ethanol is shown in Figure S2. The highest energy conversion efficiency was achieved when the ratio of I<sub>2</sub>/I<sup>-</sup> was 1:10.

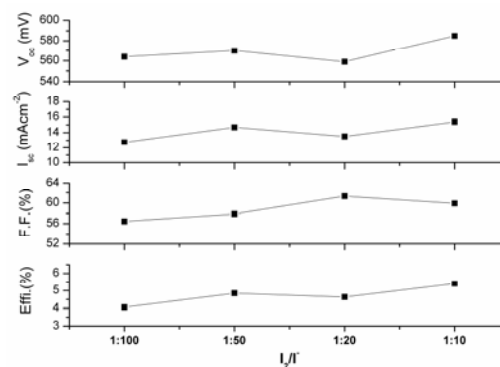

Figure S2 The DSSC parameters variations with the ratio of I<sub>2</sub>/I<sup>-</sup> in the AlI<sub>3</sub> based electrolyte in ethanol. [TBP] = 0.6 M, all the data were measure at AM 1.5, 100 mWcm<sup>-2</sup>.

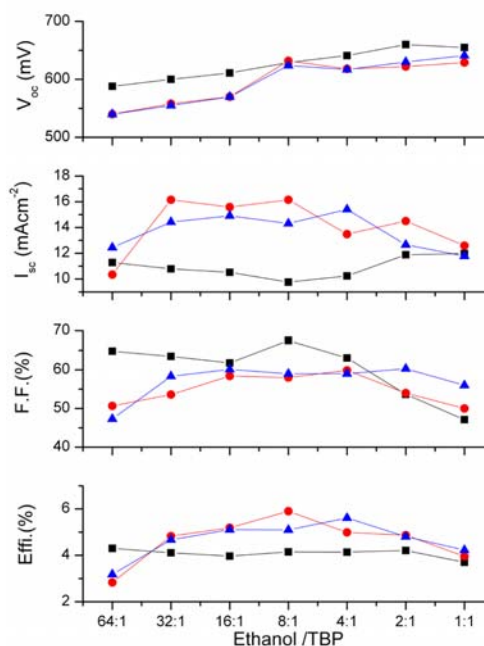

Figure S3 The DSSC parameters variations with the ratio of ethano/TBP (v/v). red: *in-situ* AlI<sub>3</sub> (electrolyte A), blue: commercial AlI<sub>3</sub> (electrolyte B), Black: LiI (electrolyte C). I<sub>2</sub>/I<sup>-</sup> = 1:10, all the data were measure at AM 1.5, 100 mWcm<sup>-2</sup>.

The influence of the concentration of 4-*tert*-butylpyridine (TBP) is investigated by varying the ratio of ethanol/TBP. As shown from Figure S3, for electrolyte A and B, the variations of open-circuit voltage (*V*<sub>oc</sub>), short-circuit photocurrent density (*I*<sub>sc</sub>), FF

and overall energy conversion efficiency ( $\eta$ ) show almost same trends, which indicates the *in-situ*  $\text{AlI}_3$  based electrolyte's performance is same as or better than that of the commercial  $\text{AlI}_3$  based electrolyte. Moreover, by this *in-situ* preparation method, we can prevent the hydrolysis of  $\text{AlI}_3$  and avoid using very expensive anhydrous commercial  $\text{AlI}_3$ . Also shown in Figure S3 is the performance of electrolyte C (LiI based electrolyte). Except the higher  $V_{oc}$ , the overall performance of LiI based electrolyte is inferior to aluminum iodide based electrolytes.

The following materials are supplied to demonstrate the chemical state of  $\text{AlI}_3$  in ethanol.

$\text{AlI}_3$  has different state in different solvents.<sup>1</sup> It can exist as dissociated ions, or as dimmer molecules, or possibly as  $\text{AlI}_4^-$  ions, like the case of molten salts.<sup>2a</sup> We compared the chemical state of  $\text{AlI}_3$  in three different systems to clarify this point: (1)  $\text{AlI}_3$  in ethanol at different concentrations (2)  $\text{AlI}_3$  in n-hexane at different concentrations; (3)  $\text{AlI}_3$  plus LiI in ethanol at different concentrations. The last system should be beneficial for the formation of  $\text{AlI}_4^-$  if it does exist.

In order to understand the chemical state of  $\text{AlI}_3$  in different systems, we employed UV-Vis spectroscopy, FT-Raman spectroscopy, Secondary Ion Mass Spectrometry (SIMS) and conductivity measurements to characterize these solutions. UV-vis spectroscopy was employed to show the state of  $\text{I}^-$  and  $\text{I}_3^-$  ions. FT-Raman spectroscopy was used to check the existence of  $\text{AlI}_4^-$  ions and  $\text{Al}_2\text{I}_6$  dimmers. SIMS ( $\text{Cs}^+$  ion being the incident ion beam) was for checking the species of ions in an  $\text{AlI}_3$  ethanol solution. Conductivity measurement is also helpful to understand the state of free ions in the solution. If  $\text{AlI}_3$  in ethanol exists as dimmer mainly, the ionic conductivity should be very low, if it is dissociated, the solution should have respectable ionic conductivity. If  $\text{AlI}_4^-$  is formed preferably in the ethanol solution of  $\text{AlI}_3$  and LiI instead of dissociated individual ions,  $\text{Li}^+$ ,  $\text{Al}^{3+}$ ,  $\text{I}^-$ , the conductivity of  $\text{AlI}_4^-$  forming solution should be much less than that of a solution with dissociated  $\text{AlI}_3$

and LiI since the free ions concentration and mobility are smaller in the former.

The following is the experimental results of the above mentioned methods.

#### (1) UV-vis spectroscopy results

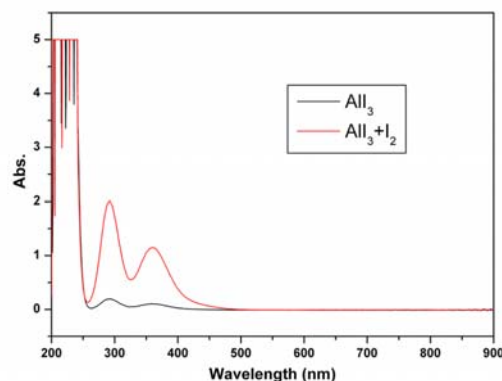

Figure S4 UV-vis spectra of the  $\text{AlI}_3$  ethanol solution (black line) and the  $\text{AlI}_3$  and  $\text{I}_2$  ethanol solution (red line).

UV-vis spectroscopy was used to investigate the state of iodide in the solutions. The spectra were recorded by a UV-visible spectrophotometer (Shimadzu, UV-2550). Figure S4 shows the UV-vis spectra of  $\text{AlI}_3$  ethanol solution (Solution 1, black line) and  $\text{AlI}_3$  ethanol solution with addition of a small amount of  $\text{I}_2$  (Solution 2, red line). In Solution 1, the concentration of  $\text{AlI}_3$  was  $2.5 \times 10^{-3}$  M. The intense absorption of Solution 1 at about 220 nm can be assigned to  $\text{I}^-$ , whereas the very weak absorptions at 290 nm and 360 nm can be assigned to  $\text{I}_3^-$ .<sup>3</sup> The existence of  $\text{I}_3^-$  in the Solution 1 can be ascribed to the oxidization of  $\text{I}^-$  by air during the sample preparation and testing. The spectrum indicates that, in Solution 1,  $\text{AlI}_3$  could be dissociated and  $\text{I}^-$  exists as free ions. In Solution 2,  $[\text{AlI}_3]$  was  $2.5 \times 10^{-3}$  M and  $[\text{I}_2]$  was  $4 \times 10^{-5}$  M. The much stronger absorptions of  $\text{I}_3^-$  at 290 nm and 360 nm suggest the increased concentration of  $\text{I}_3^-$ .<sup>3</sup> It can be inferred from Figure S4 that  $\text{AlI}_3$  is dissociated in ethanol and  $\text{I}^-/\text{I}_3^-$  acts as a redox couple in the iodine-added  $\text{AlI}_3$  electrolyte. The same phenomena can be observed in the LiI/ $\text{I}_2$  ethanol system.<sup>3</sup>

In order to clearly demonstrate the UV-vis spectra in the low wavelength range ( $< 300$  nm), dilute solutions were prepared and the UV-vis spectra were recorded.

The UV-vis spectra of  $\text{AlI}_3$  (0.05 mM and 0.15 mM) in n-hexane,  $\text{AlI}_3$  (0.05 mM) in ethanol and  $\text{LiI}$  (0.15 mM) in ethanol are shown in Figure S5. In the ethanol solutions of  $\text{AlI}_3$  (0.05 mM), an absorption peak at about 220 nm is observed while in the ethanol solutions of  $\text{LiI}$  (0.15 mM), an absorption peak at the same band is observed, which is assigned to  $\text{I}^-$  ions.<sup>3</sup> Therefore,  $\text{I}^-$  anions exist in the dilute ethanol solutions of  $\text{AlI}_3$ . In the n-hexane solution of  $\text{AlI}_3$  (0.05 mM), there was no absorption peak at 220 nm (Figure S5). Even when the concentration of  $\text{AlI}_3$  in n-hexane was increase to 0.15 mM, the absorption peak at 220 nm also cannot be observed (Figure S5).

These observations indicated that  $\text{I}^-$  and  $\text{I}_3^-$  did exist in  $\text{AlI}_3$  ethanol solution while no  $\text{I}^-$  and  $\text{I}_3^-$  anions could be detected out in the case of  $\text{AlI}_3$  in n-hexane.

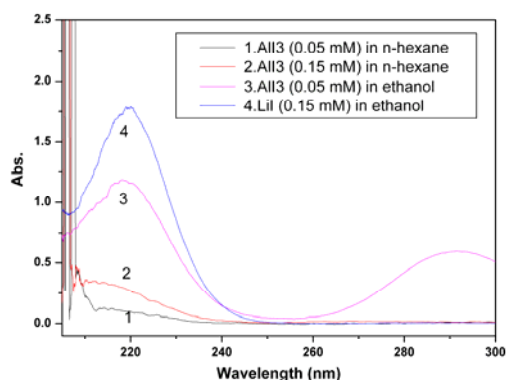

Figure S5 UV-vis spectra of  $\text{AlI}_3$  and  $\text{LiI}$  in different solutions to show whether  $\text{I}^-$  ions absorption peak at 220 nm is present in these solutions.

## (2) FT-Raman results

Solid-state  $\text{AlI}_3$  exists as dimmers and can be written as  $\text{I}_2\text{AlI}_2\text{AlI}_2$ , where  $\text{I}_t$  is the terminal iodine atoms,  $\text{I}_b$  is the bridging iodine atoms (Scheme 1). The characteristic Raman frequency of the stretching vibration of  $\text{Al-I}_b$  in  $\text{AlI}_3$  dimer molecule is  $148\text{ cm}^{-1}$ .<sup>4</sup>

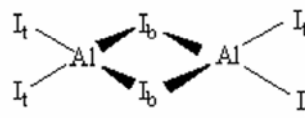

Scheme S1 The  $\text{AlI}_3$  dimer

If  $\text{AlI}_3$  exist as dimer molecules in a solvent, the Raman shift at  $148\text{ cm}^{-1}$  will appear in the Raman spectrum. If  $\text{AlI}_3$  is dissociated in a solvent, the Raman shift at  $148\text{ cm}^{-1}$  will disappear. So we recorded the Raman spectra of  $\text{AlI}_3$  (0.5 M) in n-hexane and in ethanol to detect the  $\text{Al-I}_b$  characteristic Raman shift.

The FT-Raman spectra (by a Bruker EQUINOX55) of n-hexane and  $\text{AlI}_3$  (0.5M) n-hexane solution were recorded (Figure S6). When  $\text{AlI}_3$  was dissolved in n-hexane, the peak at  $148\text{ cm}^{-1}$  is still present and it could be assigned to the stretching vibration of  $\text{Al-I}_b$ .<sup>4</sup> Moreover, in other Raman spectra range, the spectrum of n-hexane solution of  $\text{AlI}_3$  was same to that of n-hexane and no change could be observed (data not shown). In contrast, when  $\text{AlI}_3$  was dissolved in ethanol, no peak could be observed at  $148\text{ cm}^{-1}$  (Figure S6), indicating that no  $\text{AlI}_3$  dimer existed in the ethanol solution.

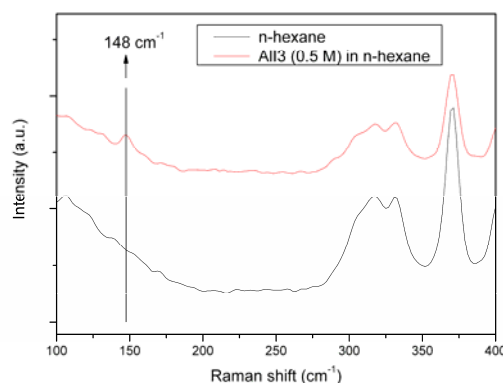

Figure S6 Raman spectra of n-hexane and n-hexane solution of  $\text{AlI}_3$  (0.5 M) to show the characteristic Raman frequency of the stretching vibration  $\text{AlI}_3$  dimer molecule at  $148\text{ cm}^{-1}$ .

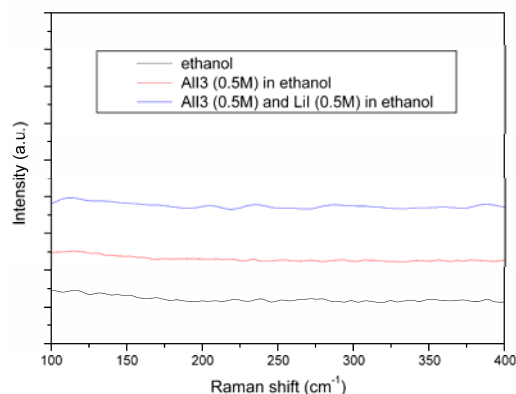

Figure S7 Raman spectra of ethanol and  $\text{AlI}_3$  and  $\text{LiI}$  ethanol solutions to show that Raman frequency of the vibration of  $\text{AlI}_4^-$  at  $146\text{ cm}^{-1}$  is absent.

$\text{AlI}_4^-$  was reported in an  $\text{AlI}_3/\text{CsI}$  molten salt system. The Raman vibration frequencies of  $\text{AlI}_4^-$  were reported to be  $51\text{ (m)}$ ,  $82\text{ (m)}$ ,  $146\text{ (s)}$  and  $336\text{ cm}^{-1}\text{ (w)}$ .<sup>2</sup> (m, s and w stand for medium, strong, weak). As shown in Figure S7, the strong peak at  $146\text{ cm}^{-1}$  is absent in the case of  $\text{AlI}_3$  in ethanol, even though after the addition of  $\text{LiI}$  in the solution (Figure S7). Moreover, we found that, when  $\text{AlI}_3$  was dissolved in ethanol, the anti-symmetric C-C-O stretch<sup>5</sup> at  $1052\text{ cm}^{-1}$  (Figure S8 b) and the out-of-plane C-C-O deformation<sup>5</sup> at  $436\text{ cm}^{-1}$  (Figure S8 a) shifted to low frequencies. The red-shift of Raman band means that the interaction between the  $\text{Al}^{3+}$  ions and hydroxyl group. This kind of shift had been observed in other metal ions and alcohols system.<sup>6</sup>

Moreover, it can be explained that the dissociation of  $\text{AlI}_3$  in ethanol is due to an interaction between cations and hydroxyl group.

### (3) Secondary Ion Mass Spectrometry (SIMS) results

Mass spectrometry is widely used to identify ions species in solutions.<sup>7</sup> Secondary Ion Mass Spectrometry (SIMS) has the capability of analyzing all elements in the periodic table as well as all isotopes. Typical detection limits for trace elemental analysis are in the ppm to ppb range.<sup>8</sup> In addition, SIMS was used successfully to detect ions species in an ionic liquid

containing  $\text{AlCl}_4^-$ ,  $\text{Al}_2\text{Cl}_7^-$  and  $\text{Al}_2\text{OCl}_5^-$  etc,<sup>9</sup> which is a quite similar system to the present system.

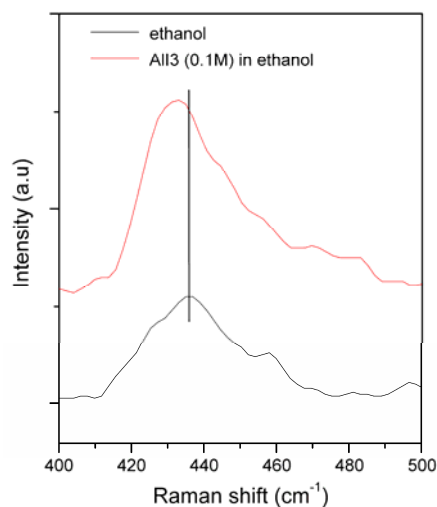

(a)

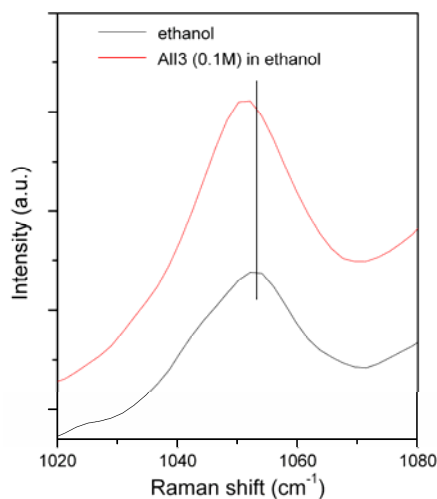

(b)

Figure S8 (a) and (b) Raman spectra of ethanol and  $\text{AlI}_3$  (0.1 M) ethanol solution to show the shifts of Raman peaks after  $\text{AlI}_3$  is dissolved in ethanol. (The straight lines are drawn to indicate the Raman frequencies shifts)

Table S1 Mass spectrum data for saturated  $\text{AlI}_3$  ethanol solution

| m/z  | 126.9050     | 253.8095       | 267.7995         | 386.7156         |
|------|--------------|----------------|------------------|------------------|
| ions | $\text{I}^-$ | $\text{I}_2^-$ | $\text{NaI}_2^-$ | $\text{CsI}_2^-$ |

The Mass Spectrum (Table S1 and Figure S9) of saturated  $\text{AlI}_3$  ethanol solution (ca. 1M) was recorded by

a Bruker APEX II FT-ICR-MS using the  $\text{Cs}^+$  ions as the ions source.

Besides the peaks at 267.7995 and 386.7156, which could be ascribed to  $\text{NaI}_2^-$  and  $\text{CsI}_2^-$  respectively, the observed ions were  $\text{I}^-$  and  $\text{I}_2^-$ . The  $\text{NaI}_2^-$  peak may cause by the impurity in the commercial  $\text{AlI}_3$  (Aldrich, 95%) and the  $\text{CsI}_2^-$  peak was due to the interaction of  $\text{Cs}^+$  and  $\text{I}^-$ . So from the mass spectra, no  $\text{AlI}_4^-$  could be observed.

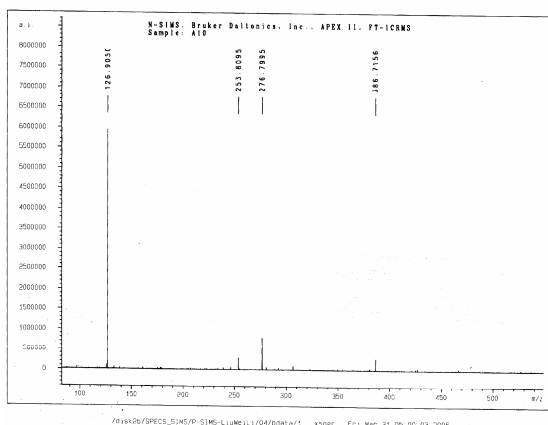

Figure S9 Mass spectra of saturated  $\text{AlI}_3$  ethanol solution (ca. 1M)

#### (4) Ionic conductivity measurement results

Ionic conductivity measurements of electrolytes were carried out by an electrochemical cell of Pt electrodes assembled in the glove box. The cell constant was determined with 0.01 M KCl solution at 25 °C. The ionic conductivities of electrolytes were determined by an AC impedance technique using an HP 4192A impedance analyzer from 5 Hz to 13 MHz. The AC voltage was fixed at 0.005V. The conductivity measurement data were analyzed by ZView.

The conductivities of the *in-situ* prepared  $\text{AlI}_3$  (0.1 M, other solutions of  $\text{AlI}_3$  used commercial  $\text{AlI}_3$ ), commercial  $\text{AlI}_3$  (0.1M) and LiI (0.3M) in ethanol were measured and were listed in Table S2.

Table S2 Ionic conductivities ( $\sigma$ ) of  $\text{AlI}_3$  and LiI solutions (1)

| Solutions (25°C)               | In-situ $\text{AlI}_3$ (0.1 M) in ethanol | Commercial $\text{AlI}_3$ (0.1 M) in ethanol | LiI (0.3 M) in ethanol |
|--------------------------------|-------------------------------------------|----------------------------------------------|------------------------|
| $\sigma$ ( $\text{Scm}^{-1}$ ) | $5.20 \times 10^{-3}$                     | $5.12 \times 10^{-3}$                        | $3.79 \times 10^{-3}$  |

The conductivities of  $\text{AlI}_3$  in n-hexane (0.1 M and 0.5 M), LiI in ethanol solution (0.1 M) and ethanol solution of  $\text{AlI}_3$  (0.1 M) and LiI (0.1 M) were also measured to study the conductivity of  $\text{AlI}_3$  in n-hexane and ethanol solutions.

Table S3 lists the ionic conductivities of  $\text{AlI}_3$  and LiI solutions. Only if  $\text{AlI}_3$  dissociates into ions can the  $\text{AlI}_3$  solution possess respectable ionic conductivity. The ionic conductivity of  $\text{AlI}_3$  (0.1 M) ethanol solution was determined to be  $5.12 \times 10^{-3} \text{ Scm}^{-1}$  (Table S2). The high conductivity suggests the dissociation of  $\text{AlI}_3$  in ethanol. In contrast, the conductivity of either 0.1M or 0.5M  $\text{AlI}_3$  n-hexane solution was in the  $10^{-10} \text{ Scm}^{-1}$  magnitude. This is due to the association of  $\text{AlI}_3$  as dimmers in n-hexane as mentioned above: no free ions are available in the n-hexane  $\text{AlI}_3$  solution.

Table S3 Ionic conductivities ( $\sigma$ ) of  $\text{AlI}_3$  and LiI solutions (2)

| Solutions (25°C)                                          | $\sigma$ ( $\text{Scm}^{-1}$ ) |
|-----------------------------------------------------------|--------------------------------|
| $\text{AlI}_3$ (0.1 M) in n-hexane                        | $< 10^{-10}$                   |
| $\text{AlI}_3$ (0.5 M) in n-hexane                        | $< 10^{-10}$                   |
| $\text{AlI}_3$ (0.1 M) in ethanol                         | $5.12 \times 10^{-3}$          |
| LiI (0.1 M) in ethanol                                    | $1.96 \times 10^{-3}$          |
| Ethanol solution of $\text{AlI}_3$ (0.1 M) and LiI (0.1M) | $7.66 \times 10^{-3}$          |

On the other hand, the conductivity of ethanol solution of  $\text{AlI}_3$  (0.1M) and LiI (0.1M) was also measured to investigate the influence of LiI addition on the conductivity of  $\text{AlI}_3$  ethanol solution. Since the conductivity of a solution can be written as:

$$\sigma = \sum n_i c_i u_i \quad (1)$$

where  $n$  is the valence of a free ion,  $c$  is the concentration of the free ion and  $u$  is the mobility of the ion.  $\text{AlI}_4^-$  is much larger than other ions ( $\text{Al}^{3+}$ ,  $\text{Li}^+$ ,  $\text{I}^-$ ) in the electrolyte, if  $\text{AlI}_4^-$  ions were formed in the electrolyte, the conductivity would decrease due to the large volume of  $\text{AlI}_4^-$  and the decreased concentration of free ions in the electrolyte. However, contrary to this prediction, the conductivity of ethanol solution of  $\text{AlI}_3$  (0.1M) and LiI (0.1M) was  $7.66 \times 10^{-3} \text{ Scm}^{-1}$ . This value

is comparable to the sum of individual values of  $\text{AlI}_3$  (0.1M) ethanol solution and  $\text{LiI}$  (0.1M) ethanol solution. So the formation of  $\text{AlI}_4^-$  is unlikely in the ethanol solution of  $\text{AlI}_3$  (0.1M) and  $\text{LiI}$  (0.1M).

Based on the above analysis and experimental results, we conclude that  $\text{AlI}_3$  has different state in different solvents. In inert and non-polar solvents, such as n-hexane (dielectric constant,  $\epsilon = 1.89$  at  $20^\circ\text{C}$ )<sup>10</sup>, it exists as dimer molecules. In polar solvents, such as ethanol ( $\epsilon = 25.3$  at  $20^\circ\text{C}$ )<sup>10</sup>, it dissociates into  $\text{Al}^{3+}$  ions and  $\text{I}^-$  ions due to the interaction between cations and ethanol molecules, as confirmed by FT-Raman spectra. In the meantime,  $\text{AlI}_4^-$  ions could not be detected in the  $\text{AlI}_3$  ethanol solutions, even though in the case that excessive  $\text{I}^-$  ions were present by adding  $\text{LiI}$ . Actually, the working principle of DSSC is based on the transport of  $\text{I}^-$  and  $\text{I}_3^-$ . The high ionic conductivity and the respectable energy conversion efficiency of DSSC achieved by  $\text{AlI}_3$  ethanol electrolytes were also means the dissociation of  $\text{AlI}_3$  in ethanol.

#### REFERENCES for Supporting Information:

- (a) Wade, K.; Banister, A. J. In *Comprehensive Inorganic Chemistry*, Bailar, J. C. Jr.; Emeléus, H.J.; Sir Nyholm, R.; Trotman-Dickenson, A.F. Eds.; Pergamon, Oxford, 1973; Vol.3, p1023. (b) Baaz, M. Gutmann, V. In *Friedel-Crafts and Related Reactions*; Olah, G. A. Eds.; Interscience Publishers: New York, 1963; Vol.1, pp367-377.
- (a) Begun, G.M.; Boston, C.R.; Torsi, G.; Mamantov, G. *Inorg. Chem.*, **1971**, 5, 886. (b) Aubauer, C.; Engelhardt, G.; Klapötke, T.M.; Schulz, A. *J. Chem. Soc., Dalton Trans.*, **1999**, 1729.
- Kebede, Z.; Lindquist, S.-E. *Sol. Energy Mat. Solar Cells*, **1999**, 57, 259.
- (a) Wade, K.; Banister, A. J. In *Comprehensive Inorganic Chemistry*, Bailar, J. C. Jr.; Emeléus, H.J.; Sir Nyholm, R.; Trotman-Dickenson, A.F. Eds.; Pergamon, Oxford, 1973; Vol.3, p1015. (b) Beattie, I.R.; Horder, J.R. *J. Chem. Soc. A*, **1969**, 2655. (c) Adams, D.M.; Churchill, R.G. *J. Chem. Soc. A*, **1970**, 697.
- Characteristic Raman Frequencies of Organic Compounds*, Dollish, F.R.; Fateley, W.G.; Bentley, F.F.; John Wiley & Sons, Inc.: New York, London, Sydney, Toronto, 1974; Chap.3.
- (a) Hester, R.E.; Plane, R.A. *Spectrochimica Acta*, **1967**, 23A, 2289. (b) Al-Baldawi, S.A.; Brooker, M.H.; Gough, T.E.; Irish, D.E. *Can. J. Chem.*, **1970**, 48, 1202. (c) Abe, N.; Ito, M. *J. Raman Spectrosc.*, **1978**, 7, 161. (d) Kanno, H.; Yamauchi, S. *J. Raman Spectrosc.*, **1993**, 24, 403.
- (a) Bergeron, D.E.; Roach, P.J.; Castleman, A.W. Jr.; Jones, N.O.; Khanna, S.N. *Science*, **2005**, 307, 231. (b) Abdul-Sada, A.K.; Greenway, A.M.; Seddon K.R. Welton, T. *Org. Mass Spectrom.*, **1992**, 27, 648. (c) Abdul-Sada, A.K.; Greenway, A.M.; Seddon K.R. Welton, T. *Org. Mass Spectrom.*, **1993**, 28, 759. (d) Wicelinski, S.P.; Gale, R.J.; Pamidimukkala, K.M.; Laine, R.A. *Anal. Chem.*, **1988**, 60, 2228. (e) Lee, T. D.; Anderson, W.R. Jr.; Daves, G. D. Jr. *Anal. Chem.*, **1981**, 53, 304.
- (a) Hanton, S.D. *Chem. Rev.*, 2001, 101, 527. (b) Pacholski, M.L.; Winograd, N. *Chem. Rev.*, 1999, 99, 2977. (c) [http://www.albanynanotech.org/Programs/metrology/pdf/PHI\\_6300.pdf](http://www.albanynanotech.org/Programs/metrology/pdf/PHI_6300.pdf)
- Franzen, G.; Gilbert, B.P.; Pelzer, G.; DePauw, E. *Org. Mass Spectrom.*, **1986**, 21, 443.
- Lange's Handbook of Chemistry*, Dean, J.A. Ed.; McGraw-Hill Inc., New York, 1998.

#### Full form of Reference (8):

Nazeeruddin, M. K.; Péchy, P.; Renouard, T.; Zakeeruddin, S. M.; Humphry-Baker, R.; Comte, P.; Liska, P.; Cevey, L.; Costa, E.; Shklover, V.; Spiccia, L.; Deacon, G. B.; Bignozzi C. A.; Grätzel, M. *J. Am. Chem. Soc.*, **2001**, 123, 1613.
